# Supplementary material for: A novel colorimetric and fluorescent chemosensor for acetate ions in aqueous media based on a rhodamine 6G–phenylurea conjugate in the presence of Fe(iii) ions
Source: Royal Society of Chemistry journal article supplement (doi:10.1039/c0cc04136j), 2010-11-26
Supplement: c0cc04136j.pdf [file c0cc04136j.pdf]

## Supporting information

### A novel colorimetric and fluorescent chemosensor for acetate ion in aqueous media based on Rhodamine 6G-phenylurea conjugate in the presence of Fe(III) ion

Zhi-Qiang Hu, \*† Xiao-Ming Wang,† Yong-Cheng Feng,† Lei Ding, † Ming Li, † and Cun-Sheng Lin†

†*State Key Laboratory Base of Eco-chemical Engineering, College of Chemistry and Molecular Engineering, Qingdao University of Science and Technology, Qingdao 266042, P. R. China.*

[huzhiqiang@qust.edu.cn](mailto:huzhiqiang@qust.edu.cn)

#### Contents

|                                                                   |         |
|-------------------------------------------------------------------|---------|
| 1. Apparatus and reagents -----                                   | page S2 |
| 2. Synthesis and structural characterization of <b>RGPU</b> ----- | page S2 |
| 3. General procedure for AcO <sup>-</sup> detection -----         | page S3 |
| 4. Figure S1-----                                                 | page S3 |
| 5. Figure S2-----                                                 | page S4 |
| 6. Figure S3-----                                                 | page S4 |
| 7. Figure S4-----                                                 | page S5 |
| 8. Figure S5-----                                                 | page S5 |

9. Figure S6-----page S6

10 Figure S7-----page S6

11. Figure S8-----page S7

12. Figure S9-----page S7

12. Figure S10-----page S8

## 1 apparatus and reagents

A Techcomp UV-8500 spectrophotometer (Shanghai, China) was used for absorption measurement. The fluorescence spectra were recorded with a Hitachi F-2500 spectrofluorimeter. NMR spectra were measured on a Bruker DMX-500 spectrometer at 500 MHz in CD<sub>3</sub>CN. All other chemicals used were local products of analytical grade. Distilled water was used throughout the experiment. The solutions of metal ions were prepared from their perchlorate salts. The solutions of anions were prepared from their sodium salts. All solvent used in spectroscopic analysis are spectroscopic grade.

## 2 Synthesis and structural characterization of RGPU

Rhodamine 6G hydrochloride (1.9g, 4mmol) was refluxing in CH<sub>3</sub>OH with NH<sub>3</sub> continuously pumped into for about 4h. As cooling at room temperature, the resulting precipitates were filtered off, washed with 20ml methanol and dried under vacuum. Then the residue was dissolved in 20 ml dry DMF and NaH (0.24g, 10mmol) was slowly added. The mixture was stirred about 15 minutes. After the colorless changing to orange, PhNCO (0.71g, 6mmol) dissolved in about 15 ml dry DMF was dropwise added in 20 minutes. At the end of the addition, the mixture was stirred about 30 minutes. The solvent was removed and the obtained residue was purified by silica gel column chromatography with Petroleum ether/EtOAc (3:1, v/v) as eluent to afford 0.74g **RGPU** as a white solid,

Yield, 34.7%. m.p.: 268-269°C.  $^1\text{H}$ NMR ( $\text{CD}_3\text{OCD}_3$ , 500MHz, TMS) :  $\delta$  =10.94(s, 1H); 8.30 (d,  $J$  = 7.5 Hz, 1H); 7.72 (t,  $J$ =7.5Hz, 1H); 7.65 (t,  $J$  = 7.5 Hz, 1H); 7.46 (d,  $J$  = 8.5 Hz, 2H); 7.25 (t,  $J$ = 7.5 Hz, 2H) ; 7.13 (d,  $J$  = 7.5 Hz, 1H); 7.00 (t,  $J$  = 7.0 Hz, 1H); 6.33 (m,  $J$  = 11 Hz 4H); 4.43 (s, 2H); 3.25 (m,  $J$  = 6.5 Hz, 4H); 1.99 (s, 6H); 1.28 (t,  $J$  = 7 Hz, 6H).  $^{13}\text{C}$  NMR( $\text{CD}_3\text{OCD}_3$ , 250MHz, TMS ) :  $\delta$  166.5, 151.7, 147.6, 138.4, 135.1, 128.8, 127.0, 124.4, 123.6, 123.1, 119.0, 117.3, 106.9, 96.2, 37.9, 16.0, 13.8. ESI-MS 533.4  $[\text{M}+\text{H}]^+$ ; Anal. Calcd for  $\text{C}_{33}\text{H}_{32}\text{N}_4\text{O}_3$ : C, 74.41; H, 6.06; N, 10.52; Found: C, 74.37; H, 6.35; N, 10.81.

### 3. General procedure for $\text{AcO}^-$ detection

A  $1.0 \times 10^{-4}\text{M}$  stock solution of **RGPU** was prepared in  $\text{CH}_3\text{CN}$ . To 10-mL glass tubes containing different amounts of  $\text{Fe}^{3+}$  and anions, proper amounts of the solution of **RGPU** was directly added with micropipette, then diluted with  $\text{H}_2\text{O}$  and  $\text{CH}_3\text{CN}$  to 10mL and mixed. The absorption and fluorescence sensing of metal ions were running immediately.

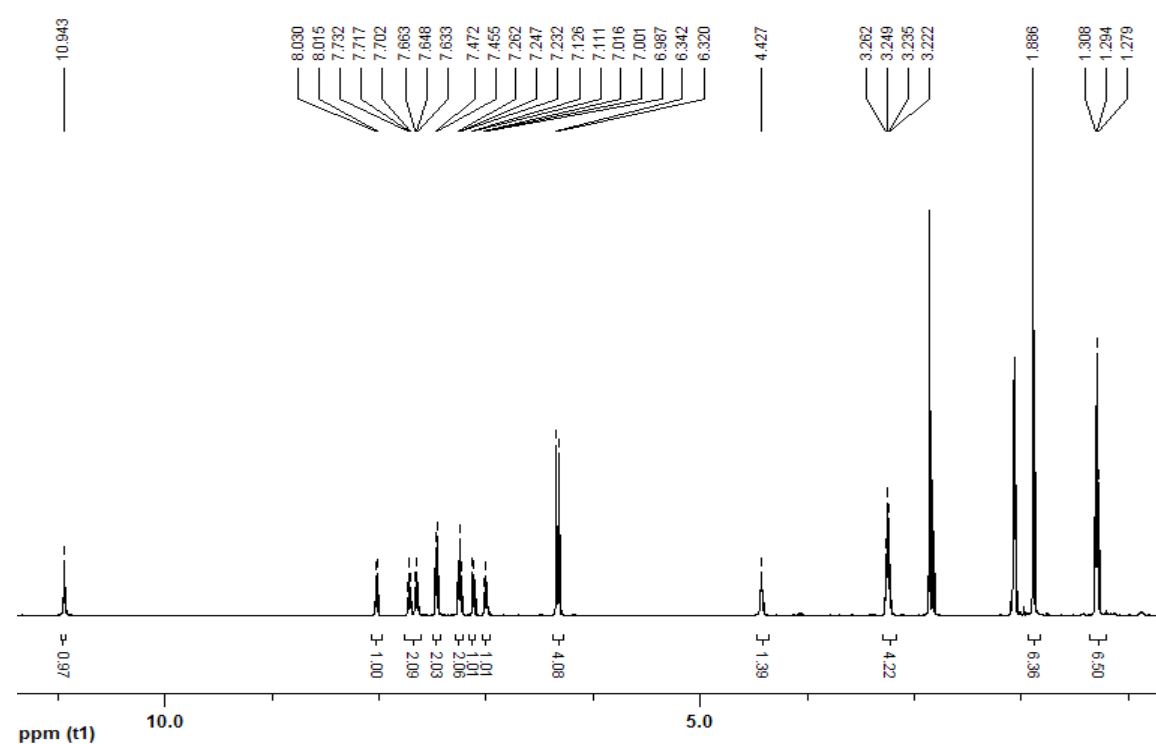

Fig. S1  $^1\text{H}$  NMR of **RGPU**

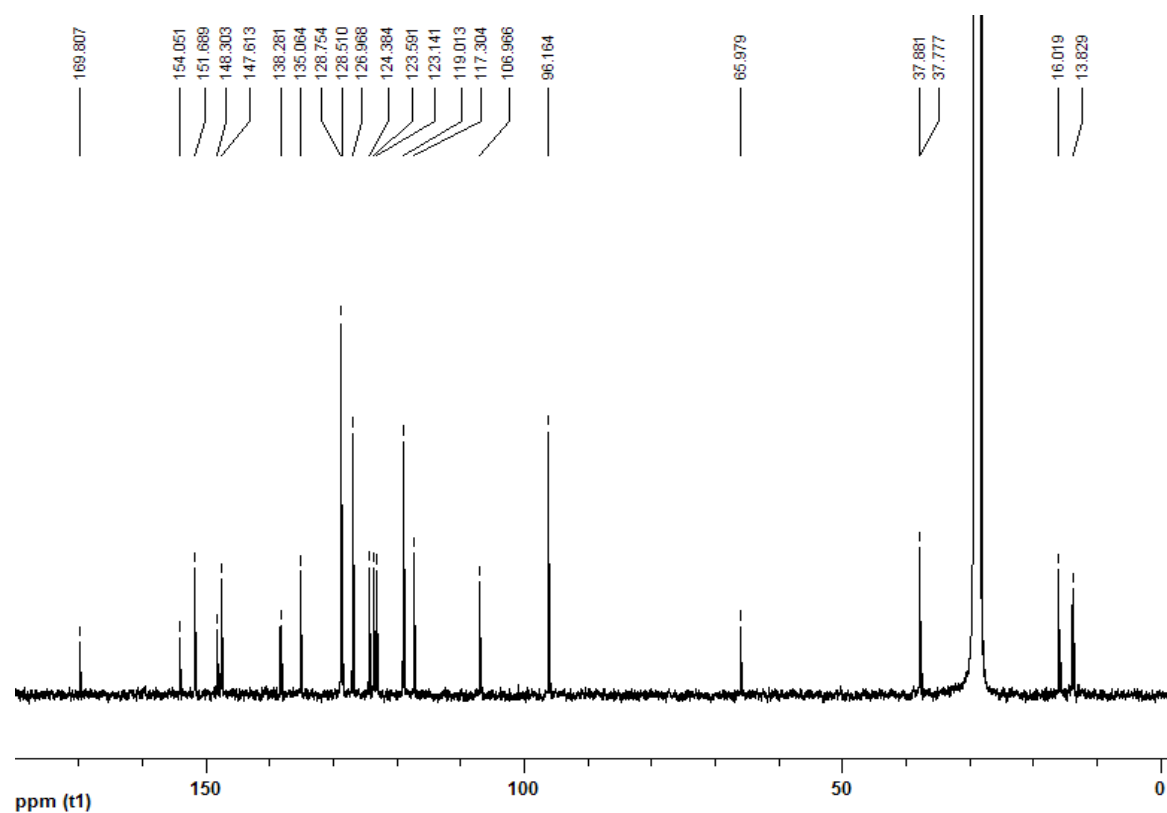

Fig. S2  $^{13}\text{C}$  NMR of RGPU

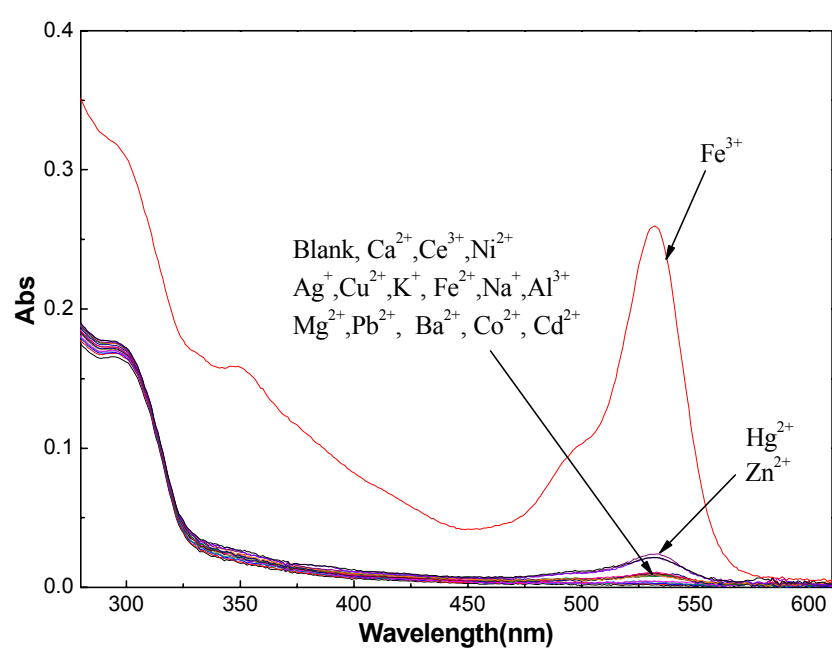

Fig. S3 Absorption spectra of RGPU (10  $\mu\text{M}$ ) upon addition of respective metal ions (as perchlorate salt, 50 equiv.) in  $\text{CH}_3\text{CN}-\text{H}_2\text{O}$  (1/1, v/v).

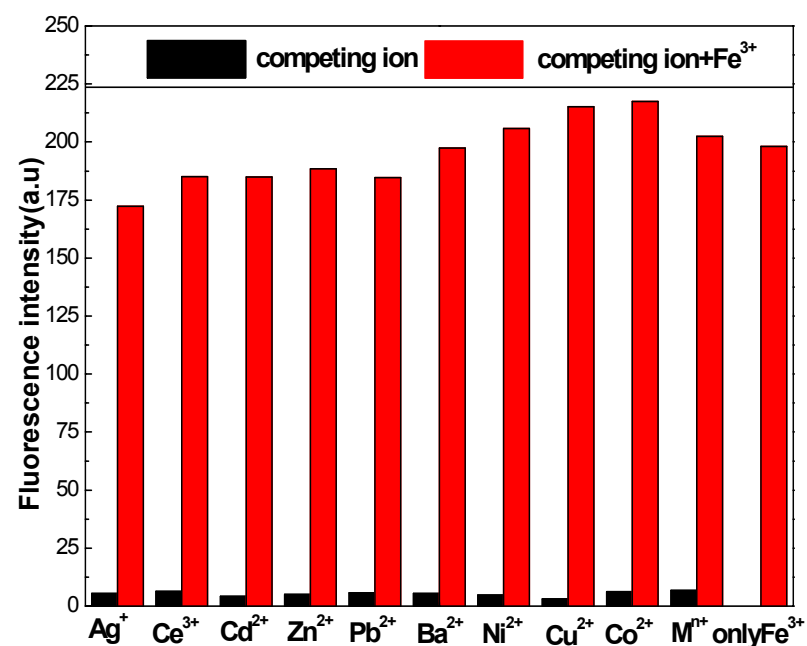

Fig. S4 Fluorescence intensity of **RGPU** (1  $\mu\text{M}$ ) upon the addition of 20  $\mu\text{M}$   $\text{Fe}^{3+}$  in the presence of 100  $\mu\text{M}$  background metal ions ( $\text{M}^{n+}$ :  $\text{Hg}^{2+}$ ,  $\text{K}^+$ ,  $\text{Na}^+$ ,  $\text{Al}^{3+}$ ,  $\text{Mg}^{2+}$ ) in  $\text{CH}_3\text{CN-H}_2\text{O}$  (1:1, v/v),  $\lambda_{\text{ex}} = 483\text{nm}$ .

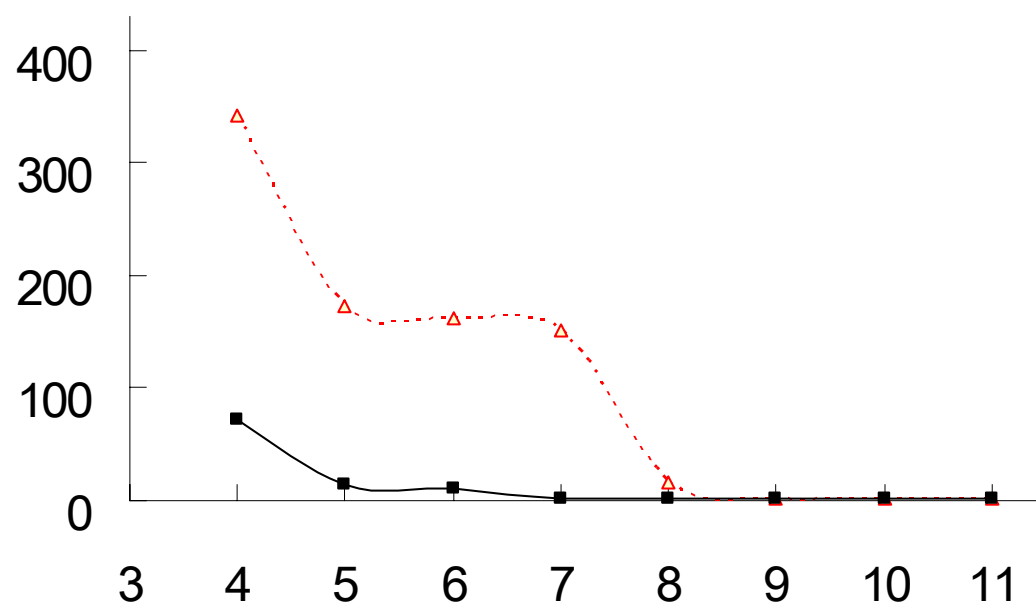

Fig. S5 Variation of fluorescence intensity of **RGPU** (1  $\mu\text{M}$ ) in  $\text{CH}_3\text{CN-H}_2\text{O}$  (1:1, v/v) with (red) and without (black)  $\text{Fe}^{3+}$  (15  $\mu\text{M}$ ) as a function of pH.

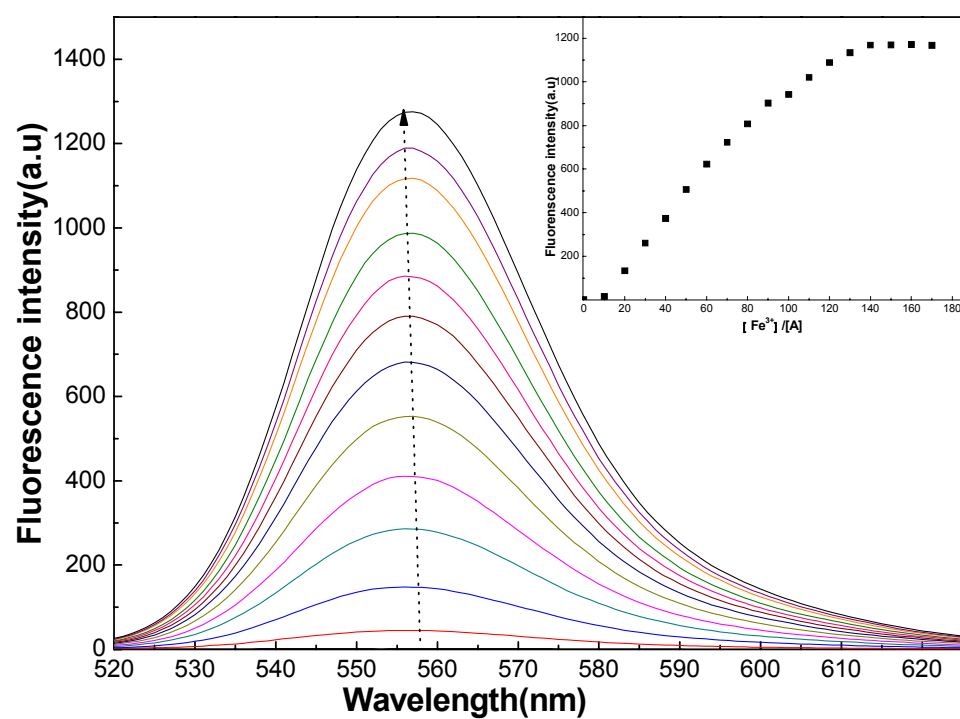

Fig. S6 Fluorescence ( $\lambda_{\text{exc}} = 483 \text{ nm}$ ) titration spectra of **RGPU** ( $1 \mu\text{M}$ ) with  $\text{Fe}^{3+}$  ( $0 \sim 110 \mu\text{M}$ ) in  $\text{CH}_3\text{CN-H}_2\text{O}$  ( $1/1, \text{v/v}$ )

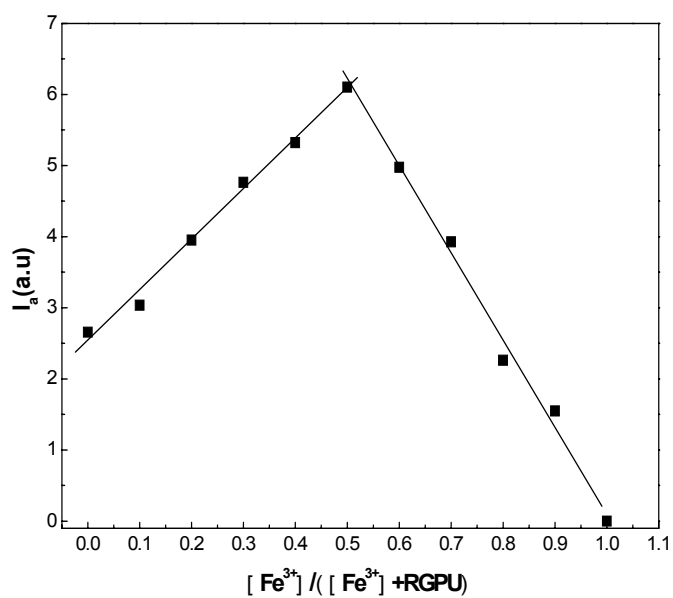

Fig. S7 Job's plot of the complex formed by **RGPU/Fe<sup>3+</sup>**

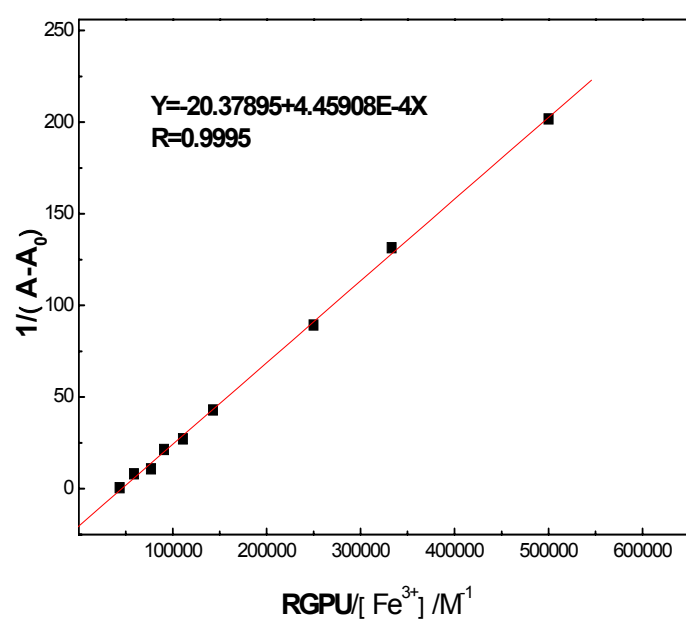

Fig. S8 Benesi-Hildebrand plot of **RGPU** (1  $\mu$ M) in CH<sub>3</sub>CN/H<sub>2</sub>O (1:1 v/v) assuming 1:1 stoichiometry between **RGPU** and Fe<sup>3+</sup>

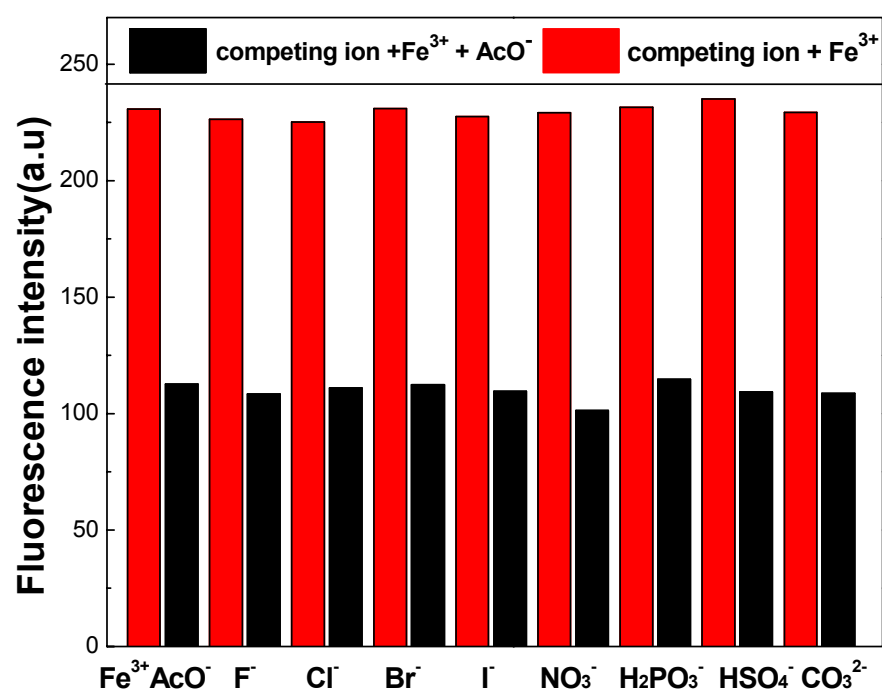

Fig. S9 Fluorescence intensity of **RGPU** (1  $\mu$ M) upon addition of 10 equiv. AcO<sup>-</sup> in the presence of 20  $\mu$ M Fe<sup>3+</sup> and 20  $\mu$ M other anion in CH<sub>3</sub>CN-H<sub>2</sub>O (1:1 v/v).  $\lambda_{ex}$  = 485nm.

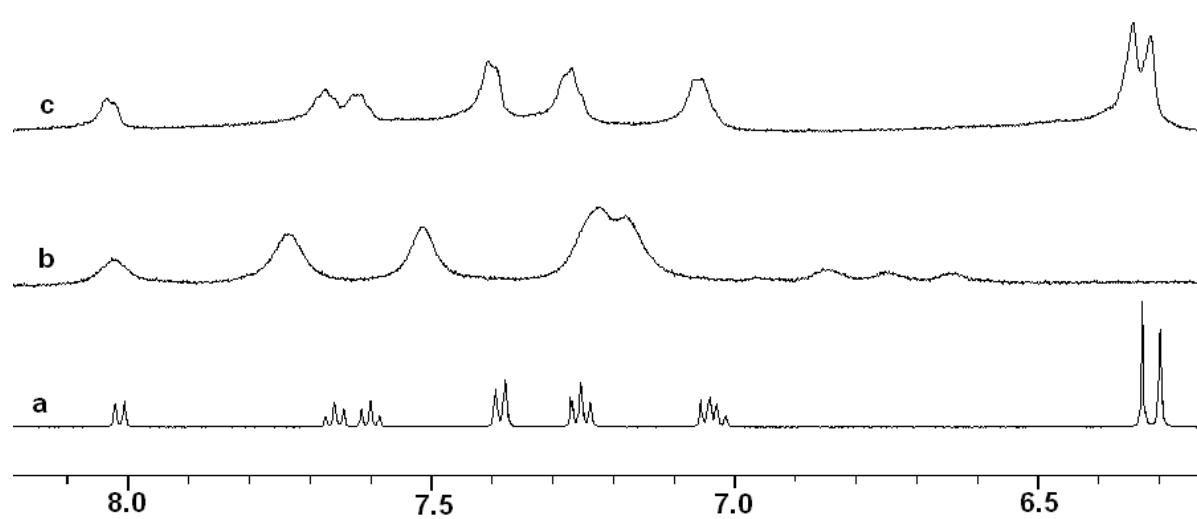

Fig. S10 Partial <sup>1</sup>H NMR spectra of (a) **RGPU**(5mM) in CD<sub>3</sub>CN; (b) **RGPU** in CD<sub>3</sub>CN in the presence of Fe<sup>3+</sup>(50mM); (c) **RGPU** in CD<sub>3</sub>CN in the presence of Fe<sup>3+</sup> ion(50mM) and AcO<sup>-</sup> (20mM).
